# Supplementary material for: Revealing the structures of megadalton-scale DNA complexes with nucleotide resolution
Source: PubMed Central journal article supplement (PMC7718922; doi:10.1038/s41467-020-20020-7), 2020-12-04
Supplement: 41467_2020_20020_MOESM10_ESM.pdf [file 41467_2020_20020_MOESM10_ESM.pdf]

**Title:** Supplementary Data 1:

**Descriptions:** Sequences of scaffold DNA and staple oligonucleotides.

**Title:** Supplementary Movie 1:

**Descriptions:** Domain motions of the twist tower object identified via 3D classification.

**Title:** Supplementary Movie 2:

**Descriptions:** Breathing motions of the pointer v2 object identified via 3D classification, cross-sectional view,

**Title:** Supplementary Movie 3:

**Descriptions:** Breathing motions of the pointer v2 object identified via 3D classification, helical view.

**Title:** Supplementary Movie 4:

**Descriptions:** Illustration of multi-domain refinement and focussed scanning refinement

**Title:** Supplementary Movie 5:

**Descriptions:** Illustration of cascaded relaxation procedure for a region within the twist tower object.
